# Supplementary material for: The core stimulon of Corynebacterium pseudotuberculosis strain 1002 identified using ab initio methodologies
Source: Royal Society of Chemistry journal article supplement (doi:10.1039/c2ib00092j), 2012-01-01
Supplement: c2ib00092j.pdf [file c2ib00092j.pdf]

### GO by Process/ GO Level:3

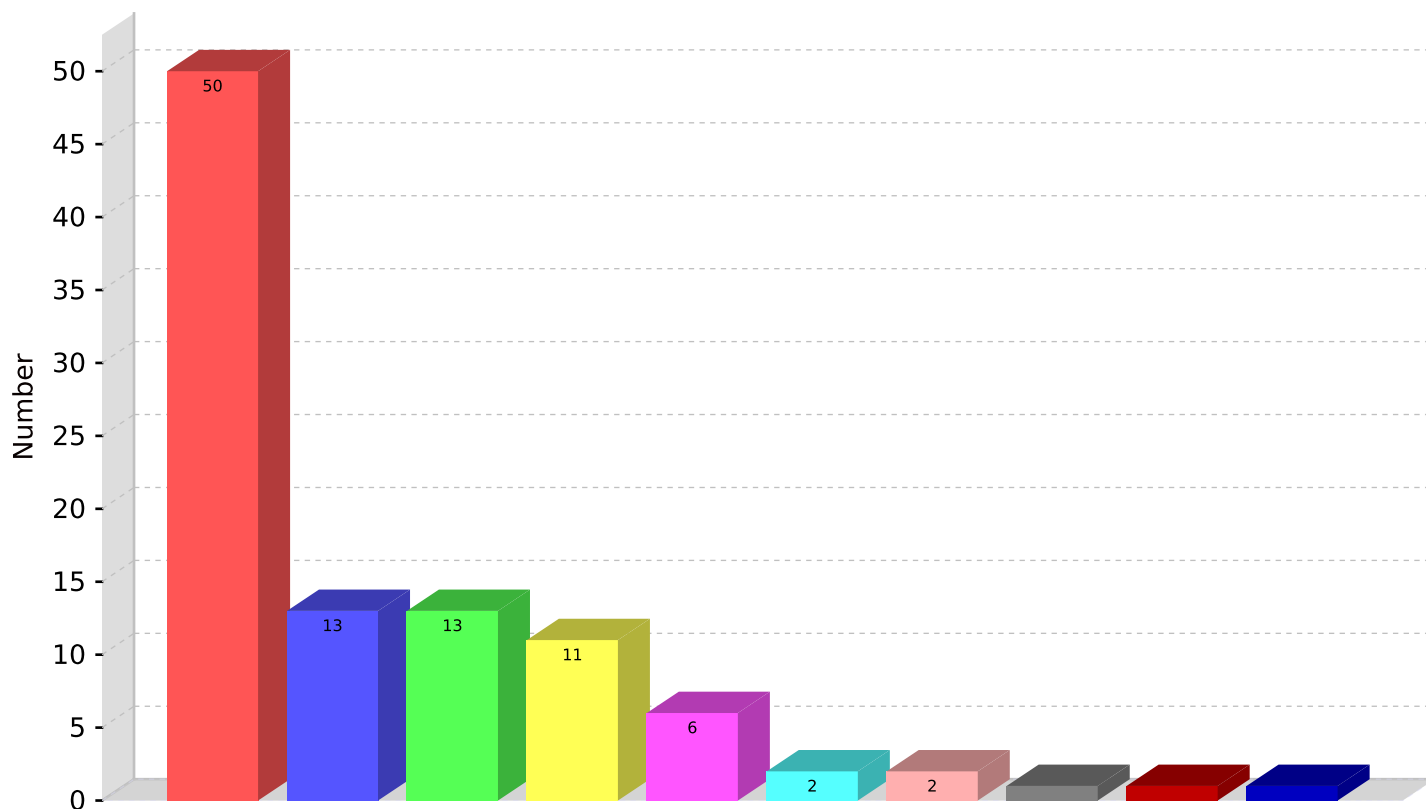

- oxidation reduction
- cell division
- cell cycle
- biosynthetic process
- response to stress
- cell adhesion
- chromosome segregation
- primary metabolic process
- pathogenesis
- nitrogen compound metabolic process

#### biosynthetic process

| CDS         | Annotation                                        |
|-------------|---------------------------------------------------|
| Cp1002_1103 | aminotransferase biotin synthesis related protein |
| Cp1002_1228 | cobalamin-biosynthesis related aminotransferase   |
| Cp1002_1798 | cobalamin-biosynthesis related aminotransferase   |
| Cp1002_0784 | glycosyl transferase                              |
| Cp1002_1141 | glycosyl transferase                              |
| Cp1002_1526 | isochorismate synthase                            |
| Cp1002_0502 | mannose-1-phosphate guanyltransferase             |
| Cp1002_0772 | n-succinyldiaminopimelate aminotransferase        |
| Cp1002_1182 | pima gene product                                 |
| Cp1002_1951 | pks13 gene product                                |
| Cp1002_0668 | utp-glucose-1-phosphate uridylyltransferase       |

#### cell adhesion

| CDS         | Annotation                                            |
|-------------|-------------------------------------------------------|
| Cp1002_0113 | abc-type iron uptake system substrate-binding protein |
| Cp1002_1765 | secreted protein                                      |

### cell cycle

| CDS         | Annotation                                           |
|-------------|------------------------------------------------------|
| Cp1002_1260 | cell division protein                                |
| Cp1002_1388 | cell division protein                                |
| Cp1002_1392 | cell division protein                                |
| Cp1002_1168 | esx-3 secretion system protein eccc3                 |
| Cp1002_1390 | murc gene product                                    |
| Cp1002_1396 | mure gene product                                    |
| Cp1002_1395 | murf gene product                                    |
| Cp1002_1391 | murg gene product                                    |
| Cp1002_1386 | sepf gene product                                    |
| Cp1002_0715 | septum formation initiator protein                   |
| Cp1002_1601 | trigger factor                                       |
| Cp1002_1695 | udp-n-acetylglucosamine 1-carboxyvinyltransferase    |
| Cp1002_1393 | udp-n-acetylmuramoyl-l-alanyl-d-glutamate synthetase |

### cell division

| CDS         | Annotation                                           |
|-------------|------------------------------------------------------|
| Cp1002_0581 | cell division protein                                |
| Cp1002_1260 | cell division protein                                |
| Cp1002_1392 | cell division protein                                |
| Cp1002_1794 | cell division protein                                |
| Cp1002_1168 | esx-3 secretion system protein eccc3                 |
| Cp1002_1390 | murc gene product                                    |
| Cp1002_1396 | mure gene product                                    |
| Cp1002_1395 | murf gene product                                    |
| Cp1002_1391 | murg gene product                                    |
| Cp1002_0866 | segregation and condensation protein b               |
| Cp1002_1601 | trigger factor                                       |
| Cp1002_1695 | udp-n-acetylglucosamine 1-carboxyvinyltransferase    |
| Cp1002_1393 | udp-n-acetylmuramoyl-l-alanyl-d-glutamate synthetase |

### chromosome segregation

| CDS         | Annotation                           |
|-------------|--------------------------------------|
| Cp1002_1260 | cell division protein                |
| Cp1002_1168 | esx-3 secretion system protein eccc3 |

### nitrogen compound metabolic process

| CDS         | Annotation               |
|-------------|--------------------------|
| Cp1002_1915 | urease accessory protein |

**oxidation reduction**

| CDS         | Annotation                                           |
|-------------|------------------------------------------------------|
| Cp1002_2024 | 2-dehydropantoate 2-reductase                        |
| Cp1002_1299 | 4-hydroxy-3-methylbut-2-en-1-yl diphosphate synthase |
| Cp1002_1165 | 4-hydroxy-3-methylbut-2-enyl diphosphate reductase   |
| Cp1002_0879 | aldo keto-reductase family protein                   |
| Cp1002_1218 | alkyl hydroperoxide reductase                        |
| Cp1002_1219 | alkyl hydroperoxide reductase subunit                |
| Cp1002_1642 | bacterioferritin comigratory protein                 |
| Cp1002_0173 | catalase                                             |
| Cp1002_1785 | choline dehydrogenase                                |
| Cp1002_1424 | cytochrome c oxidase subunit                         |
| Cp1002_1095 | cytochrome oxidase assembly protein                  |
| Cp1002_1117 | cytochrome ubiquinol oxidase subunit                 |
| Cp1002_1694 | cytochrome ubiquinol oxidase subunit                 |
| Cp1002_0894 | d-3-phosphoglycerate dehydrogenase                   |
| Cp1002_1265 | dihydrodipicolinate reductase                        |
| Cp1002_0240 | dihydrolipoamide dehydrogenase                       |
| Cp1002_2043 | dna protection during starvation protein             |
| Cp1002_0953 | dtdp-4-dehydrorhamnose reductase                     |
| Cp1002_0445 | fold gene product                                    |
| Cp1002_0273 | glutamyl-trna reductase                              |
| Cp1002_1105 | glutathione peroxidase                               |
| Cp1002_1106 | glyceraldehyde-3-phosphate dehydrogenase             |
| Cp1002_1866 | glycerol-3-phosphate dehydrogenase                   |
| Cp1002_0831 | homoserine dehydrogenase                             |
| Cp1002_1469 | inosine 5-monophosphate dehydrogenase                |
| Cp1002_0424 | inosine-5 -monophosphate dehydrogenase               |
| Cp1002_0890 | ketol-acid reductoisomerase                          |
| Cp1002_1991 | l-lactate dehydrogenase                              |
| Cp1002_1993 | manganese superoxide dismutase                       |
| Cp1002_0839 | membrane protein                                     |
| Cp1002_1522 | membrane protein                                     |
| Cp1002_0204 | n-acetyl-gamma-glutamyl-phosphate reductase          |
| Cp1002_1808 | nitronate monooxygenase                              |
| Cp1002_0827 | oxidoreductase subunit                               |
| Cp1002_0337 | oxidoreductase                                       |
| Cp1002_1088 | oxidoreductase                                       |
| Cp1002_1528 | oxygen-independent coproporphyrinogen iii oxidase    |
| Cp1002_1192 | peptide methionine sulfoxide reductase               |
| Cp1002_1392 | phytoene dehydrogenase                               |
| Cp1002_1496 | pyruvate dehydrogenase subunit e1                    |
| Cp1002_1672 | ribonucleotide-diphosphate reductase subunit beta    |
| Cp1002_0798 | suca gene product                                    |
| Cp1002_0243 | succinate dehydrogenase flavoprotein subunit         |
| Cp1002_0242 | succinate dehydrogenase subunit                      |
| Cp1002_2020 | thioredoxin                                          |
| Cp1002_1708 | tim-barrel containing enzyme                         |
| Cp1002_1967 | udp-galactopyranose mutase                           |
| Cp1002_1269 | udp-glucose 6-dehydrogenase                          |
| Cp1002_1593 | udp-glucose 6-dehydrogenase                          |
| Cp1002_1393 | udp-n-acetylmuramoyl-l-alanyl-d-glutamate synthetase |

---

**pathogenesis**

---

| CDS         | Annotation                              |
|-------------|-----------------------------------------|
| Cp1002_0660 | two-component system response regulator |

---

**primary metabolic process**

---

| CDS         | Annotation                              |
|-------------|-----------------------------------------|
| Cp1002_0519 | ribosome-associated inhibitor protein y |

---

**response to stress**

---

| CDS         | Annotation                               |
|-------------|------------------------------------------|
| Cp1002_2043 | dna protection during starvation protein |
| Cp1002_1897 | grpe gene product                        |
| Cp1002_1898 | molecular chaperone                      |
| Cp1002_1369 | rna-binding heat shock protein           |
| Cp1002_0660 | two-component system response regulator  |
| Cp1002_2012 | universal stress protein                 |
