# Supplementary material for: The core stimulon of Corynebacterium pseudotuberculosis strain 1002 identified using ab initio methodologies
Source: Royal Society of Chemistry journal article supplement (doi:10.1039/c2ib00092j), 2012-01-01
Supplement: c2ib00092j_2.pdf [file c2ib00092j_2.pdf]

### GO by Process/ GO Level:3

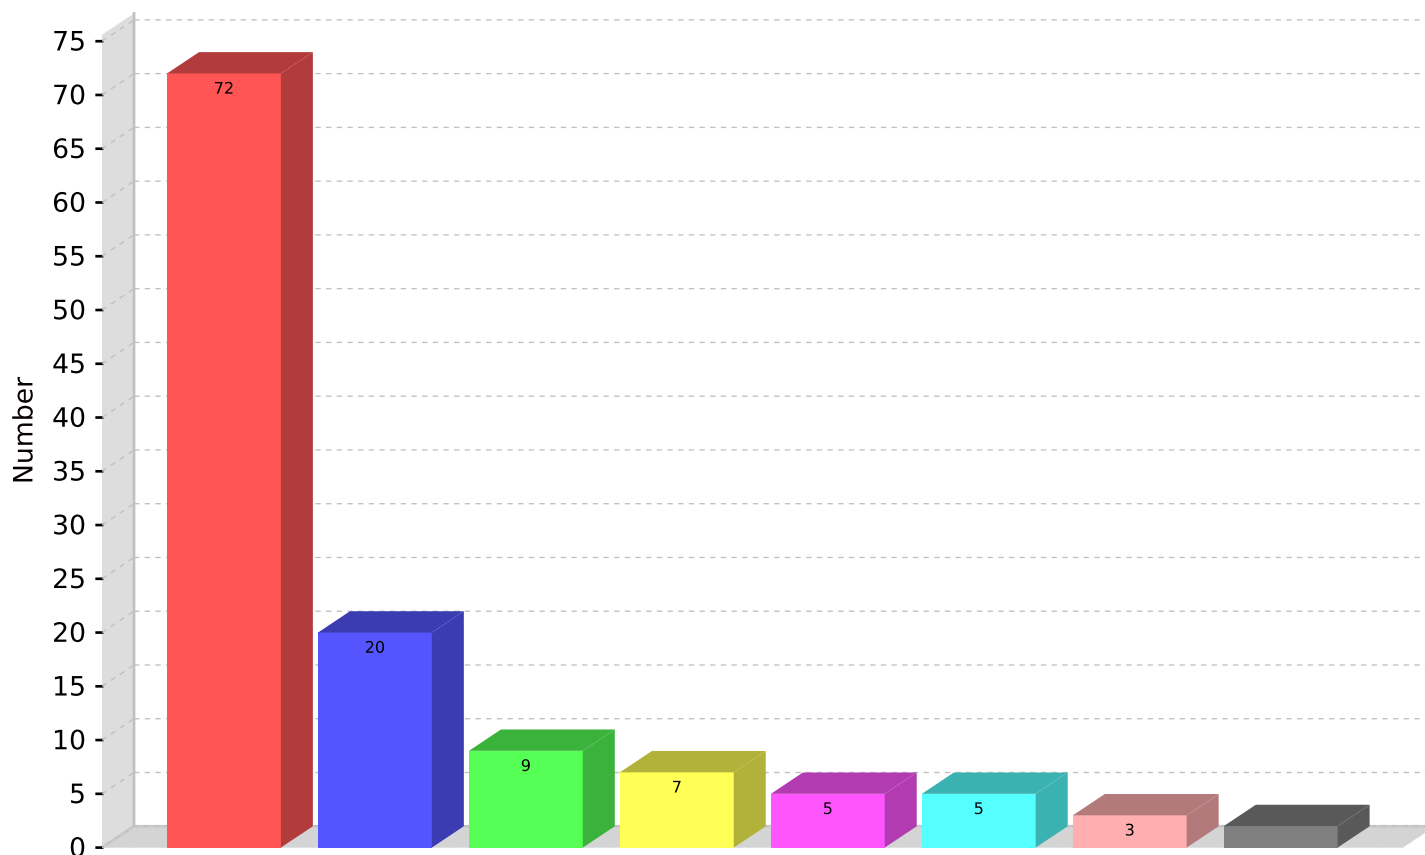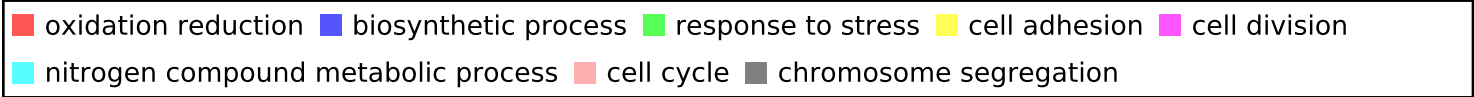

#### biosynthetic process

| CDS         | Annotation                                        |
|-------------|---------------------------------------------------|
| Cp1002_0752 | aminotransferase biotin synthesis related protein |
| Cp1002_1180 | aminotransferase biotin synthesis related protein |
| Cp1002_2083 | anthranilate synthase component i                 |
| Cp1002_0142 | aspt gene product                                 |
| Cp1002_1489 | cobalamin-biosynthesis related aminotransferase   |
| Cp1002_1019 | cobn gene product                                 |
| Cp1002_0788 | glga gene product                                 |
| Cp1002_0301 | glycosyl transferase                              |
| Cp1002_1415 | glycosyl transferase                              |
| Cp1002_1750 | glycosyl transferase                              |
| Cp1002_2079 | glycosyl transferase                              |
| Cp1002_1940 | glycosyltransferase                               |
| Cp1002_0900 | isochorismate synthase                            |
| Cp1002_0914 | isochorismate synthase                            |
| Cp1002_1177 | isochorismate synthase                            |
| Cp1002_1618 | isochorismate synthase                            |
| Cp1002_1823 | isochorismate synthase                            |
| Cp1002_1833 | isochorismate synthase                            |
| Cp1002_2080 | phytoene synthase                                 |

---

**biosynthetic process**

---

| CDS         | Annotation       |
|-------------|------------------|
| Cp1002_0155 | secreted protein |

---

---

**cell adhesion**

---

| CDS          | Annotation                                |
|--------------|-------------------------------------------|
| Cp1002_0316  | abc transporter substrate-binding protein |
| Cp1002_0988  | I domain-containing protein               |
| Cp1002_1083  | I domain-containing protein               |
| Cp1002_1811a | I domain-containing protein               |
| Cp1002_1964  | I domain-containing protein               |
| Cp1002_0439  | mnta gene product                         |
| Cp1002_0170  | surface-anchored fimbrial subunit         |

---

---

**cell cycle**

---

| CDS         | Annotation                                        |
|-------------|---------------------------------------------------|
| Cp1002_0401 | esx-3 secretion system protein eccc3              |
| Cp1002_1662 | esx-3 secretion system protein eccc3              |
| Cp1002_1394 | phospho-n-acetylmuramoyl-pentapeptide-transferase |

---

---

**cell division**

---

| CDS         | Annotation                                        |
|-------------|---------------------------------------------------|
| Cp1002_0401 | esx-3 secretion system protein eccc3              |
| Cp1002_1662 | esx-3 secretion system protein eccc3              |
| Cp1002_1394 | phospho-n-acetylmuramoyl-pentapeptide-transferase |
| Cp1002_0914 | segregation and condensation protein b            |
| Cp1002_0973 | segregation and condensation protein b            |

---

---

**chromosome segregation**

---

| CDS         | Annotation                           |
|-------------|--------------------------------------|
| Cp1002_0401 | esx-3 secretion system protein eccc3 |
| Cp1002_1662 | esx-3 secretion system protein eccc3 |

---

---

**nitrogen compound metabolic process**

---

| CDS         | Annotation                                    |
|-------------|-----------------------------------------------|
| Cp1002_0560 | copper-containing nitrite reductase           |
| Cp1002_1847 | nitrite reductase periplasmic cytochrome c552 |
| Cp1002_1326 | pii uridylyl-transferase                      |
| Cp1002_1017 | polyprenol-phosphate-mannose synthase         |
| Cp1002_1889 | upf0012 hydrolase                             |

---

**oxidation reduction**

| CDS         | Annotation                                                                                              |
|-------------|---------------------------------------------------------------------------------------------------------|
| Cp1002_0609 | -diketo-d-gluconic acid reductase a                                                                     |
| Cp1002_0753 | 2-dehydropantoate 2-reductase                                                                           |
| Cp1002_1035 | 2-dehydropantoate 2-reductase                                                                           |
| Cp1002_0742 | 4-hydroxy-3-methylbut-2-enyl diphosphate reductase                                                      |
| Cp1002_1154 | 4-hydroxy-3-methylbut-2-enyl diphosphate reductase                                                      |
| Cp1002_1338 | alanine dehydrogenase                                                                                   |
| Cp1002_1891 | alcohol dehydrogenase                                                                                   |
| Cp1002_1932 | aldehyde dehydrogenase                                                                                  |
| Cp1002_1051 | aldo keto reductase family oxidoreductase                                                               |
| Cp1002_0333 | anaerobic ribonucleoside triphosphate reductase                                                         |
| Cp1002_0171 | aspartate-semialdehyde dehydrogenase                                                                    |
| Cp1002_1783 | betaine aldehyde dehydrogenase                                                                          |
| Cp1002_0560 | copper-containing nitrite reductase                                                                     |
| Cp1002_1406 | cytochrome ubiquinol oxidase subunit                                                                    |
| Cp1002_1407 | cytochrome ubiquinol oxidase subunit                                                                    |
| Cp1002_1506 | cytochrome ubiquinol oxidase subunit                                                                    |
| Cp1002_1703 | cytochrome ubiquinol oxidase subunit                                                                    |
| Cp1002_1704 | cytochrome ubiquinol oxidase subunit                                                                    |
| Cp1002_1711 | cytochrome ubiquinol oxidase subunit                                                                    |
| Cp1002_0102 | decaprenylphosphoryl-beta-d-ribose 2-epimerase component                                                |
| Cp1002_1115 | diaminohydroxyphosphoribosylaminopyrimidine deaminase 5-amino-6-(5-phosphoribosylamino)uracil reductase |
| Cp1002_1053 | dihydroorotate dehydrogenase 2                                                                          |
| Cp1002_0233 | dtdp-4-dehydrorhamnose reductase                                                                        |
| Cp1002_1375 | dtdp-4-dehydrorhamnose reductase                                                                        |
| Cp1002_1487 | dtdp-4-dehydrorhamnose reductase                                                                        |
| Cp1002_2079 | dtdp-4-dehydrorhamnose reductase                                                                        |
| Cp1002_1833 | ferredoxin ferredoxin-nadp reductase                                                                    |
| Cp1002_0472 | flavoprotein disulfide reductase                                                                        |
| Cp1002_1578 | gamma-glutamyl phosphate reductase                                                                      |
| Cp1002_1099 | glucose-6-phosphate 1-dehydrogenase                                                                     |
| Cp1002_1731 | glutathione peroxidase                                                                                  |
| Cp1002_1702 | glycerol dehydrogenase                                                                                  |
| Cp1002_1436 | glycine dehydrogenase                                                                                   |
| Cp1002_1359 | histidinol dehydrogenase                                                                                |
| Cp1002_0425 | inosine 5-monophosphate dehydrogenase                                                                   |
| Cp1002_0053 | membrane protein                                                                                        |
| Cp1002_0591 | membrane protein                                                                                        |
| Cp1002_1907 | membrane protein                                                                                        |
| Cp1002_2049 | membrane protein                                                                                        |
| Cp1002_2052 | membrane protein                                                                                        |
| Cp1002_2066 | membrane protein                                                                                        |
| Cp1002_0946 | n-acetyl-gamma-glutamyl-phosphate reductase                                                             |
| Cp1002_1043 | n-acetyl-gamma-glutamyl-phosphate reductase                                                             |
| Cp1002_1009 | nadh dehydrogenase                                                                                      |
| Cp1002_1339 | nadp-specific glutamate dehydrogenase                                                                   |
| Cp1002_0699 | nitronate monooxygenase                                                                                 |
| Cp1002_1819 | nitronate monooxygenase                                                                                 |
| Cp1002_0073 | oxidoreductase                                                                                          |
| Cp1002_0524 | oxidoreductase                                                                                          |
| Cp1002_1451 | oxidoreductase                                                                                          |
| Cp1002_1706 | phytoene dehydrogenase                                                                                  |
| Cp1002_2081 | phytoene dehydrogenase                                                                                  |
| Cp1002_1020 | precorrin-3b synthase                                                                                   |

---

**oxidation reduction**

---

| CDS         | Annotation                                         |
|-------------|----------------------------------------------------|
| Cp1002_1909 | protein fadf                                       |
| Cp1002_1748 | pyruvate dehydrogenase                             |
| Cp1002_0250 | pyruvate formate-lyase activating enzyme           |
| Cp1002_0118 | quinone oxidoreductase                             |
| Cp1002_1675 | ribonucleotide-diphosphate reductase subunit alpha |
| Cp1002_0801 | shikimate 5-dehydrogenase                          |
| Cp1002_1143 | shikimate 5-dehydrogenase                          |
| Cp1002_0101 | short chain dehydrogenase                          |
| Cp1002_0697 | short-chain dehydrogenase reductase sdr            |
| Cp1002_0086 | short-chain dehydrogenase reductase yusr           |
| Cp1002_0640 | succinate-semialdehyde dehydrogenase               |
| Cp1002_1163 | thiol peroxidase                                   |
| Cp1002_2101 | thioredoxin                                        |
| Cp1002_2100 | thioredoxin reductase                              |
| Cp1002_0118 | udp-glucose 6-dehydrogenase                        |
| Cp1002_0640 | udp-glucose 6-dehydrogenase                        |
| Cp1002_1127 | udp-glucose 6-dehydrogenase                        |
| Cp1002_1930 | udp-glucose 6-dehydrogenase                        |
| Cp1002_1544 | uncharacterized protein                            |

---

**response to stress**

---

| CDS         | Annotation                             |
|-------------|----------------------------------------|
| Cp1002_1895 | heat shock protein regulator           |
| Cp1002_1527 | heat-inducible transcription repressor |
| Cp1002_0433 | hydrolase alpha beta superfamily       |
| Cp1002_0697 | hydrolase alpha beta superfamily       |
| Cp1002_0993 | hydrolase alpha beta superfamily       |
| Cp1002_1042 | hydrolase alpha beta superfamily       |
| Cp1002_1555 | hydrolase alpha beta superfamily       |
| Cp1002_0934 | stress related protein                 |
| Cp1002_2037 | universal stress protein               |
